# Supplementary material for: Factors Influencing Vaccine Hesitancy in China: A Qualitative Study
Source: MDPI journal article supplement (doi:10.3390/vaccines9111291), 2021-11-07
Supplement: s1 [file s1]

Supplementary Table S1. A overview of factors influencing vaccine hesitancy in China.

|                               |                               |                                      | Parents of<br>children aged<br>0-6 | Older people<br>over 60 | Adults aged<br>18-59 | Healthcare<br>workers |
|-------------------------------|-------------------------------|--------------------------------------|------------------------------------|-------------------------|----------------------|-----------------------|
| Physical deciding factor      | Physical conditions           | self-immune                          | 17(40.5)                           | 13(31)                  | 10(23.8)             | 2(4.8)                |
|                               |                               | Underlying disease                   | 1(7.1)                             | 7(50)                   | 4(28.6)              | 2(14.3)               |
|                               | Risk of infection             |                                      | 9(27.3)                            | 8(24.2)                 | 8(24.2)              | 8(24.2)               |
|                               | Medical expenses              |                                      | 0(0)                               | 0(0)                    | 0(0)                 | 0(0)                  |
| Background deciding factor    | Access to professional advice | medical staff                        | 29(36.3)                           | 15(18.8)                | 25(31.3)             | 11(13.8)              |
|                               |                               | Centers for Disease Control          | 12(36.4)                           | 5(15.2)                 | 10(30.3)             | 6(18.2)               |
|                               |                               | Internet media                       | 13(39.4)                           | 4(12.1)                 | 13(39.4)             | 3(9.1)                |
|                               |                               | family and friends                   | 6(30)                              | 0(0)                    | 11(55)               | 3(15)                 |
|                               |                               | vaccinee                             | 13(61.9)                           | 3(14.3)                 | 5(23.8)              | 0(0)                  |
|                               | Social network support        | support                              | 22(34.4)                           | 8(12.5)                 | 25(39.1)             | 9(14.1)               |
|                               |                               | object                               | 17(48.6)                           | 1(2.9)                  | 13(37.1)             | 4(11.4)               |
|                               | Disease condition             | prevalence                           | 14(20.6)                           | 15(22.1)                | 24(35.3)             | 15(22.1)              |
|                               |                               | case fatality rate                   | 11(34.4)                           | 3(9.4)                  | 10(31.3)             | 8(25)                 |
|                               |                               | cure rate                            | 1(25)                              | 0(0)                    | 3(75)                | 0(0)                  |
|                               | Policy orientation            |                                      | 8(25.8)                            | 14(45.2)                | 4(12.9)              | 5(16.1)               |
|                               | Convenience                   | No specific reason given             | 7(36.8)                            | 1(5.3)                  | 9(47.4)              | 2(10.5)               |
|                               |                               | vaccine price                        | 20(26)                             | 7(9.1)                  | 35(45.5)             | 15(19.5)              |
|                               |                               | vaccination service                  | 1(8.3)                             | 3(25)                   | 5(41.7)              | 3(25)                 |
|                               |                               | vaccine supply                       | 6(33.3)                            | 2(11.1)                 | 4(22.2)              | 6(33.3)               |
|                               |                               | appointment process and waiting time | 4(19)                              | 2(9.5)                  | 11(52.4)             | 4(19)                 |
|                               |                               | geographical accessibility           | 5(55.6)                            | 3(33.3)                 | 1(11.1)              | 0(0)                  |
| Psychological deciding factor | Trust                         | vaccine safety                       | 66(34.6)                           | 30(15.7)                | 58(30.4)             | 37(19.4)              |
|                               |                               | Vaccine maturity                     | 25(31.3)                           | 7(8.8)                  | 31(38.8)             | 17(21.3)              |
|                               |                               | vaccine effectiveness                | 15(39.5)                           | 4(10.5)                 | 9(23.7)              | 10(26.3)              |
|                               | Complacency                   | Awareness of vaccination necessity   | 40(34.2)                           | 26(22.2)                | 32(27.4)             | 19(16.2)              |
|                               |                               | personal knowledge and experience    | 11(50)                             | 2(9.1)                  | 3(13.6)              | 6(27.3)               |
|                               |                               | social climate                       | 2(20)                              | 0(0)                    | 5(50)                | 3(30)                 |
|                               | Herd mentality                |                                      | 4(36.4)                            | 3(27.3)                 | 4(36.4)              | 0(0)                  |
|                               | Social responsibility         |                                      | 0(0)                               | 9(52.9)                 | 7(41.2)              | 1(5.9)                |
